# The effects of habits on motor skill learning

*Abbreviated title: The effects of habits on motor skill learning*

Nicola J. Popp<sup>1</sup>, Atsushi Yokoi<sup>2,3</sup>, Paul L. Gribble<sup>1,4,5,6</sup> & Jörn Diedrichsen<sup>1,7,8\*</sup>

<sup>1</sup> The Brain and Mind Institute, University of Western Ontario, N6A 5B7, Canada

<sup>2</sup> Graduate School of Frontier Biosciences, Osaka University, 565-0871, Japan

<sup>3</sup> Center for Information and Neural Networks (CiNet), NICT, 565-0871, Japan

<sup>4</sup> Department of Psychology, University of Western Ontario, N6A 5C2, Canada

<sup>5</sup> Department of Physiology & Pharmacology, Schulich School of Medicine & Dentistry, University of Western Ontario, N6A 5C1, Canada

<sup>6</sup> Haskins Laboratories, 06511, USA

<sup>7</sup> Department of Statistical and Actuarial Sciences, University of Western Ontario, N6A 5B7, Canada

<sup>8</sup> Department of Computer Science, University of Western Ontario, N6A 5B7, Canada

## Correspondence address

Jörn Diedrichsen, The Brain and Mind Institute, University of Western Ontario, London, Canada. [jdiedric@uwo.ca](mailto:jdiedric@uwo.ca)

*Page count:* 46

*Figures count:* 8

*Word counts:* Abstract: 245; Introduction: 620 ; Discussion 1275

## Conflict of interest

The authors declare no conflict of interest.

## Acknowledgments

This work is supported by a James S. McDonnell Foundation Scholar award, a Natural Sciences and Engineering Council of Canada (NSERC) Discovery Grant (RGPIN-2016-04890) and the Canada First Research Excellence Fund (BrainsCAN) to J.D., a NSERC Discovery Grant (RGPIN 238338) and a Canadian Institutes of Health Research Grant (PJT-153447) to P.L.G. We thank Aaron L. Wong for helpful comments on earlier versions of this manuscript.

## Abstract

1  
2 Skill learning involves the formation of stable motor patterns. In musical and athletic  
3 training, however, these stable motor habits can also impede the attainment of higher  
4 levels of performance. We developed an experimental paradigm to induce a specific  
5 motor pattern in the context of a discrete sequence production task and to investigate  
6 how these habits affect performance over a 3-week training period. Participants initially  
7 practiced small segments of 2 to 3 finger movements (“chunks”) and then learned  
8 longer sequences composed of these chunks. This initial training induced a persistent  
9 temporal pattern during execution, with shorter inter-press-intervals within a chunk and  
10 longer ones at chunk boundaries. This pattern remained stable during the subsequent  
11 10 days of training, in which participants were asked to produce the sequence as fast as  
12 possible from memory. The habit was also preserved when the sequences were directly  
13 displayed, removing the need for memory recall. We were able to induce chunking  
14 patterns that were either beneficial or detrimental to performance by taking into  
15 consideration the biomechanical constraints of the sequences. While we observed an  
16 overall reduction in the detrimental effect of the disadvantageous chunking instructions  
17 with training, our results show that the degree to which these detrimental chunk  
18 structures were maintained, was predictive of lower levels of final performance. In sum,  
19 we were able to induce beneficial and detrimental motor habits in a motor sequence  
20 production task and show that these initial instructions influenced performance  
21 outcomes over a prolonged period of time.

22

23

## Significance Statement

24 A habit is defined as an automatized action that resists modification once sufficiently  
25 established. Preventing bad habits, while reinforcing good habits, is a key objective  
26 when teaching new motor skills. While habit formation is an integral part of motor skill  
27 acquisition, previous research has focused on habit formation in terms of action  
28 selection. In this paper, we examine habit formation in terms of motor skill execution,  
29 after the action has been selected. We were able to induce beneficial or detrimental  
30 motor habits in the production of motor sequences. Habits were stable over a prolonged  
31 training period. Our results demonstrate how cognitive instruction can lead to persistent  
32 motor habits and we explore how these habits are potentially modified with training.

33

34 **Introduction**

35 What does it take to become an expert at a motor skill such as playing the piano?  
36 Clearly, practice is key. Some have proposed that 10,000 hours of training are  
37 necessary to develop a high level of performance (Ericsson et al., 1993; Hayes, 2013).  
38 However, simply practicing for many hours may not lead to expert performance, as  
39 numerous examples have shown (Haith and Krakauer, 2018). This is sometimes  
40 attributed to the formation of habits: automatic (Hélie, Waldschmidt, & Ashby, 2010;  
41 Moors & De Houwer, 2006) and highly entrenched behavioral patterns that resist  
42 change through retraining (Ashby et al., 2003; Jager, 2003; Seger and Spiering, 2011;  
43 Graybiel and Grafton, 2015; Hardwick et al., 2019).

44 Animal models have been integral to the study of habit formation and its neural  
45 underpinnings (Jog et al., 1999; Wickens et al., 2007; Smith and Graybiel, 2014, 2016;  
46 Robbins and Costa, 2017). However, the majority of animal experiments investigating  
47 habit formation have focused on habits in the context of action selection – i.e. choosing  
48 *what* action to perform. In contrast, in this paper we address the question of habits in  
49 motor performance – i.e. habits that influence *how* to perform a chosen action. For  
50 example, a tennis player could be influenced by a habitual pattern in action selection,  
51 whereby she always chooses a forehand over a backhand to return a serve. At the  
52 same time, she could be influenced by a motor habit, whereby she executes the  
53 forehand without rotating her hips.

54 Critical to the definition of a habit is that the behavior is maintained even though it  
55 is no longer adaptive (Adams, 1982; Dickinson, 1985; Dezfouli and Balleine, 2012).  
56 Most experiments, therefore, demonstrate the existence of a habit by teaching subjects

57 a behavior under one reward contingency and show its persistence when the reward  
58 contingency switches (Ashby et al., 2003; Smith and Graybiel, 2013a).

59 To investigate the influence of habit formation on motor skill learning we used a  
60 discrete sequence production task (DSP) in which participants performed an explicitly  
61 learned series of finger presses as fast as possible (Verwey, 2001; Abrahamse et al.,  
62 2013). Learning in this task depends on both cognitive and motor processes  
63 (Diedrichsen & Kornysheva, 2015; Wong, Lindquist, Haith, & Krakauer, 2015). Initial  
64 performance relies on forming a declarative memory of the sequence that can be  
65 sculpted through explicit instructions (de Kleine & Verwey, 2009; Verwey, Abrahamse, &  
66 Jiménez, 2009) and potentially can constrain subsequent motor optimization (Bo and  
67 Seidler, 2009; Seidler et al., 2012). We tested the hypothesis that the initial instruction  
68 causes the formation of a motor habit which influences the learning of execution-related  
69 skills in subsequent motor training.

70 We instructed participants to memorize long sequences of finger presses by first  
71 practicing a set of smaller 2-3 digit “chunks” on an isometric keyboard-like device  
72 (Miller, 1956; Verwey, 1996; Verwey and Dronkert, 1996; Halford et al., 1998; Wymbs et  
73 al., 2012). Two different chunk sets were used. Participants were then trained on seven  
74 11-digit sequences. Each sequence was subdivided into chunks (depending on chunk  
75 set) so that boundaries between chunks were either aligned or misaligned with  
76 biomechanically easy or difficult finger transitions. This manipulation influenced initial  
77 performance with sequences learned using the aligned chunk structure being performed  
78 faster. After the introduction phase, participants had to recall the sequences from  
79 memory and practiced them over the course of 3 weeks.

80 We investigated three questions: First, do the initial instructions lead to a stable  
81 motor performance pattern and how long does it persist? Second, to what degree are  
82 these patterns maintained even if they are detrimental to performance? Finally, what  
83 learning-related changes are involved in overcoming motor habits?

## 84 **Methods**

### 85 **Participants**

86 Forty participants who reported no neurological conditions were recruited for the study  
87 (30 females; ages: 19 to 33). Thirty-two of them were randomly assigned to learn the  
88 sequences with one of the two chunk sets (Figure 1) and the remaining eight  
89 participants were assigned to a control group. All participants were right-handed based  
90 on the Edinburgh Handedness Inventory and completed informed consent. On average,  
91 participants had received 4.68 ( $\pm$  5.55) years of musical training, with 55% percent  
92 reported having more than 6 months of experience playing the piano. While participants  
93 with piano experience performed the sequences faster than participants with no  
94 experience and the number of practice years correlated with execution speed (MT), the  
95 amount of participants' prior musical experience did not have a qualitative influence on  
96 participants' chunking behavior. The study protocol was approved by the ethics board of  
97 the University of Western Ontario.

### 98 **Apparatus**

99 A custom-built five-finger keyboard was used. The keys were not depressible but were  
100 equipped with a force transducer (FSG-15N1A, Sensing and Control, Honeywell)  
101 underneath each key which measured participants' isometric force production with a

102 repeatability of  $<0.02$  N and a dynamic range of 16 N (Wiestler and Diedrichsen, 2013;  
103 Wiestler et al., 2014; Yokoi et al., 2017). The measured force at each key was digitally  
104 sampled at 200 Hz.

### 105 **Discrete sequence production task**

106 We used a discrete sequence production task (DSP) in which participants  
107 executed sequences of 2, 3, or 11 keypresses as fast as possible while keeping their  
108 error rate under 15%. Each trial started with the visual presentation of the sequence to  
109 be executed and was completed once the participants pressed the amount of presented  
110 numbers. Each block consisted of 28 trials. A trial was deemed erroneous if participants  
111 pressed a wrong key anywhere within the sequence. No pause between presses was  
112 required and thus some co-articulation between fingers emerged with faster execution.  
113 A keypress was registered when the measured force first exceeded 3N. A key release  
114 was marked when the force measured at the same key first fell below 1.5N. To prevent  
115 participants from pressing more than 2 keys at once, we implemented a constraint such  
116 that in order for a key to be registered as depressed the key previously registered as  
117 depressed had to be released.

118 The magnitude of the force applied to each key was represented by 5 lines on an  
119 LCD monitor, with the height of the line representing the force at the corresponding key.  
120 A white asterisk (memory-guided conditions) or a digit (cued condition) for each finger  
121 press was presented above the lines. Immediately after the keypress threshold was  
122 reached, participants received visual and auditory feedback. If the correct key was  
123 pressed, the color of the cue changed from white to green and a sound was presented.

124 If the incorrect key was pressed, the cue turned red and a lower-pitch sound was  
125 presented.

126 After each trial participants received points based on their accuracy and  
127 movement time (MT; the time between the first keypress and last key release). Correct  
128 sequences performed faster than the MT threshold (see below) were rewarded with 1  
129 point. MTs that were 20% faster than the threshold were rewarded with 3 points.  
130 Incorrect presses or MTs exceeding the threshold resulted in 0 points. At the end of  
131 each block, participants received feedback on their error rate, median MT, points  
132 obtained during the block, and total points obtained during the session. In order to  
133 motivate participants to continue to improve their performance, we adjusted the MT  
134 threshold by lowering it by 500 ms after each block in which the participants performed  
135 with an error rate of 15% or lower and had a median MT faster than the current  
136 threshold. This manipulation resulted in an approximately stable overall error rate of  
137 14.6%, SD: 2.6%. On 27% of trials, participants received 1 point, on 34% of trials 3  
138 points.

### 139 **Biomechanical baseline study**

140 To design the chunks and sequences for the main experiment, we conducted a  
141 separate study to determine the influence of biomechanical constraints on finger  
142 transition speed. 7 participants (5 females, ages: 21-27) participated in this 3-day study.  
143 Participants executed all possible two-finger transitions (e.g. 25) and three-finger  
144 transitions (e.g. 125), each 8 times per day. Each sequence was presented twice in a  
145 row. Each day, participants completed 8 blocks with 150 trials each. The setup and  
146 motivational structure were the same as reported above. We found that on our device,



147 transitions between two adjacent fingers (e.g. 12) could be performed faster than two  
148 repeated presses of the same finger (e.g. 55;  $t_{(6)} = 13.965$ ,  $p = 8.404e-06$ ; Fig. 1). Given  
149 that the 2-3 press sequences hardly taxed the cognitive system, these results can be  
150 taken as a characterization of the biomechanical constraints of our specific task. To  
151 press the same finger twice, the force applied to the key had to first exceed the press  
152 threshold, then go below the release threshold and then cross the press threshold  
153 again. This rapid alternation of forces takes time to produce. In contrast, for two  
154 adjacent fingers, the second finger press can be initiated (have already reached the  
155 press threshold) before the previous finger is released, making it easier to rapidly  
156 produce this force pattern. Even though participants improved their overall speed from  
157 157 ms on the first day to 114 ms on the third day, the 5x5 pattern of relative inter-press  
158 interval (IPI) was stable both across participants (average correlation  $r = 0.689$ ) and  
159 days ( $r = 0.894$ ).

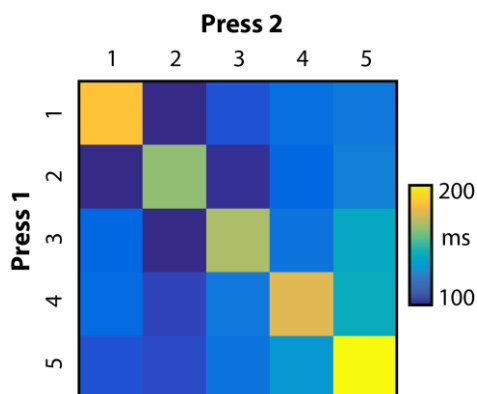

**Figure 1. Two-finger transition execution speed.**

*Biomechanical data from an independent dataset in which participants performed all possible combinations of 2 and 3-digit transitions. Matrix indicates the median inter-press interval (IPI) to produce the transition between pairs of keypresses. Indicated values are means over  $n=7$  participants.*

160

## 161 **Experimental design**

162 To experimentally impose a particular way of chunking, we instructed participants in the  
163 experimental group to memorize and perform a set of 2-3 keypress chunks (Fig. 2a).  
164 These chunks were later combined to form the training sequences (Fig. 2b). Our goal  
165 was to impose beneficial or detrimental motor habits on participants' performance. For  
166 this, we used the finding from the biomechanical baseline study that finger repetitions  
167 are performed slower than presses of adjacent fingers. We designed sequences such  
168 that they would include both fast transitions (runs e.g. 123) and slow finger repetitions  
169 (e.g. 113). Depending on which chunk structure was instructed, these transitions would  
170 either fall on a chunk boundary or lie within a chunk. In the "aligned" chunk structure we  
171 aligned the boundaries such that they fell on difficult finger transitions, which were  
172 executed slowly for biomechanical reasons. The time required to perform these difficult  
173 finger transitions can therefore simultaneously be used to recall the next chunk, which  
174 should benefit overall performance. Using this chunk structure, the 3-digit "runs" (i.e.  
175 123) which are performed quickly were kept intact (not broken up by a chunk transition).  
176 We predicted that learning the sequence using this chunk structure would be beneficial  
177 to performance speed (Fig. 2c). In the misaligned chunk structure, we placed chunk  
178 boundaries in a way that divided up biomechanically easy finger transitions such as  
179 runs, thereby breaking up parts of the sequence that could otherwise be performed very  
180 quickly. We hypothesized that this would hinder overall performance (Fig. 2c). All  
181 participants practiced the same 7 sequences (Fig. 2b). Half of the participants were  
182 instructed with the aligned chunk structure for the first 3 sequences, and the misaligned  
183 chunk structure for the next 3 sequences (Fig. 2d). For the other half of the participants,

184 the assignment of sequences to aligned and misaligned was reversed. The last  
185 sequence served as a control sequence and was chunked, such that either instruction  
186 should lead to similarly beneficial performance. The counterbalanced design (Fig. 2d)  
187 allowed us to draw strong inferences about whether participants' performance was  
188 dictated by biomechanical demands (which were identical across participants) or  
189 whether it was affected by the chunk structure imposed during the induction phase  
190 (which was different between the two chunk sets).

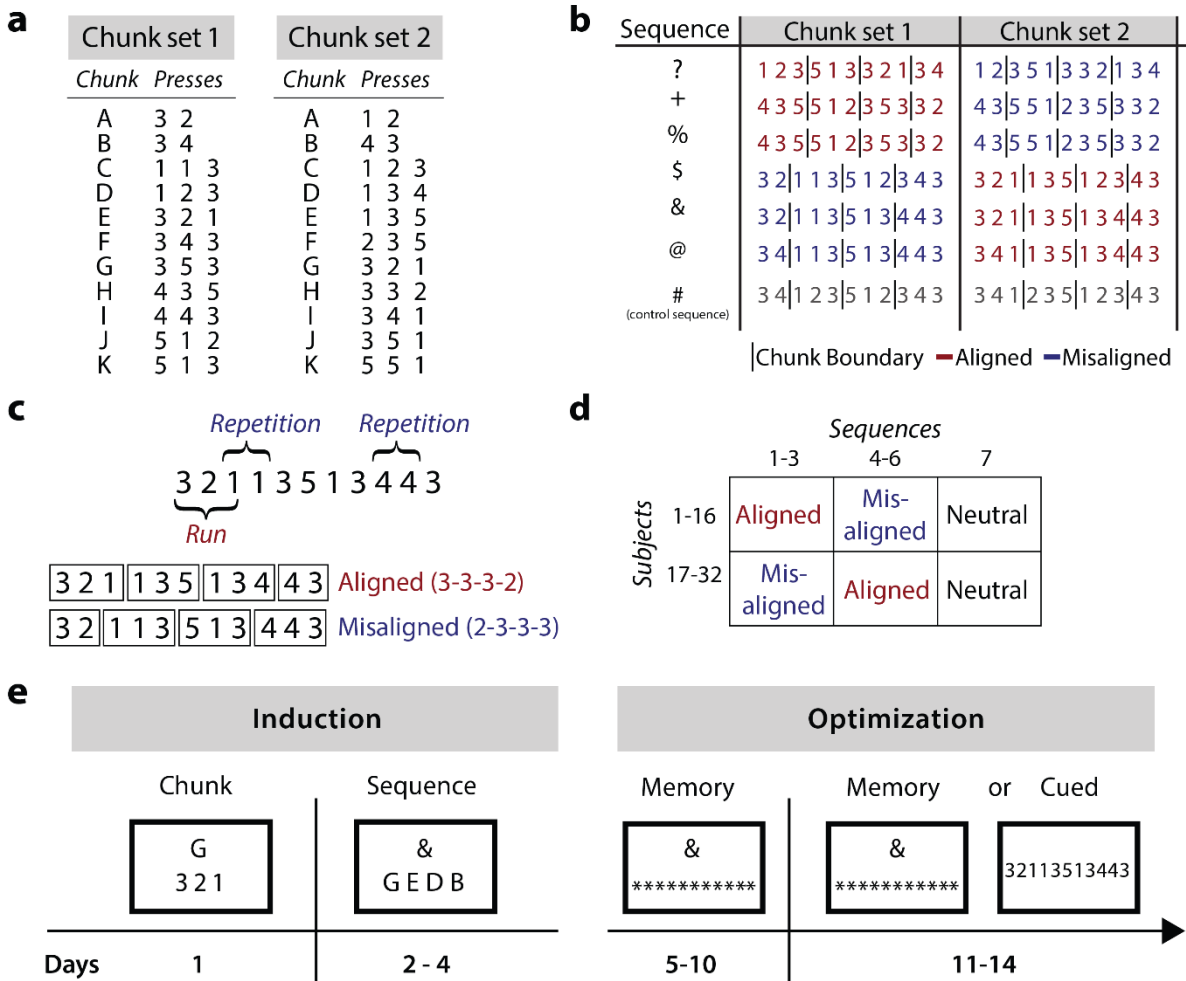

**Figure 2. Experimental design.** (a) Each participant learned 11 chunks associated with the chunk cues (A-K) from one of the chunk sets. (b) The seven 11-digit sequences that participants trained on. The vertical lines (not shown to the participants) indicate the chunk boundaries induced in training through the chunk set. Sequences were trained with an aligned (red) or misaligned (blue) chunk structure. (c) Example sequence containing a 3-digit run and two-digit repetitions. In the aligned structure, the chunk boundaries fell between repetitions, in the misaligned structure the chunk boundary broke up the run. (d) We counterbalanced across participants which sequences were practiced with which chunk structures. (e) Experimental timeline depicting the training at each stage. In the induction phase participants memorized chunks and sequences. In the optimization phase participants trained to perform these sequences as fast as possible from memory. In the last week of training, half of the participants were directly cued with the sequence, while the others performed the sequences from memory.

192           Every participant completed 15 training sessions in total (Figure 2e): one session  
193 per day across a 3-week period. Each session lasted approximately 1 hour, excluding  
194 the two initial sessions and the last session which each took 2 hours. Participants  
195 completed at least 10 blocks of 28 trials per training day. Each block comprised 4  
196 repetitions of each of the 7 sequences.

197 *Days 1-4: Chunk induction & initial sequence learning*

198 Experimental group: On Day 1 the participants were pre-trained on one of the chunk  
199 sets (Fig. 2a). Each chunk was associated with a letter of the alphabet (A-K).  
200 Participants were explicitly told to learn this association. Each letter A-K was presented  
201 twice in succession. In half of the blocks, on the first trial of each pair, the numbers  
202 corresponding to the finger presses accompanied the letter on the screen, while on the  
203 second trial participants had to recall the presses solely based on the letter (numbers  
204 were replaced with stars). This trial order was reversed on every second block. To  
205 ensure that participants had memorized the chunks we added speeded recall blocks at  
206 the end of days 1 and 2. At the end of the first day, participants could reliably produce  
207 the chunks from memory with an average accuracy of 92.7%.

208           On day 2 participants trained on the seven 11-press sequences. Each sequence  
209 was associated with a symbol (e.g. \$; suppl. Fig. 2b). Each symbol was presented twice  
210 in succession and participants had to perform the sequences from memory using the  
211 symbol cue on one trial or with the help of the chunk letters on the next trial. We tested  
212 participants' sequence knowledge with a self-paced recall block at the end of days 2-4  
213 (The first two participants did not perform the recall blocks). At the end of day 4,

214 participants were able to recall all sequences from memory using the sequence cues  
215 with an accuracy of 93.1%.

216 Control group: The control group did not receive any chunk training but instead trained  
217 directly on the seven 11-press sequences. On day 1 they were presented with the 11  
218 digits corresponding to the 11-press sequences. We matched the amount of training  
219 across groups by ensuring that all participants were required to produce the same  
220 overall number of finger presses. On day 1, the control participants were not aware that  
221 they would have to memorize the sequences later on. On days 2-4 they were instructed  
222 to memorize the sequences using the same symbolic sequence cues as the  
223 experimental groups and their memory was tested using recall blocks at the end of each  
224 day (Day 4: 90.2% accuracy). The rest of the experimental design was identical for all  
225 groups.

226 *Days 5-10: Optimization - Memory Recall*

227 On days 5-10 participants practiced exclusively on the eleven-press sequences using  
228 the symbolic cues. Chunks were no longer cued. Each sequence cue was presented  
229 twice in succession and participants had to recall the sequence from memory on both  
230 trials.

231 *Days 11-14: Optimization - Memory recall or cued presentation*

232 On the last four days of training half of the experimental participants performed the  
233 sequences from memory (as on days 5-10), while for the other half and for the control  
234 participants we removed the symbolic sequence cue and instead visually presented  
235 participants with the complete set of 11 digits that corresponded to the sequences (Fig.

236 2e). Participants completed an additional generalization test on day 15. The results of  
237 this test are not reported in this article.

## 238 **Statistical Analysis**

239 We recorded and analyzed the force measured at each key. For each trial, we  
240 calculated movement time (MT, time between the first press and last release) and inter-  
241 press-intervals (IPIs; time between force peaks of two consecutive presses). All  
242 analyses were performed using custom-written code in MATLAB (The MathWorks). We  
243 excluded from our analyses trials that contained one or more incorrect presses, as well  
244 as trials with an MT or a press with an IPI three standard deviations above the mean  
245 calculated across all days and participants. The data were analyzed using mixed-effects  
246 analysis of variance (mixed ANOVA), Pearson's correlation and paired and one-sample  
247 t-tests. All t-tests were two-sided. A probability threshold of  $p < 0.05$  for the rejection of  
248 the null hypothesis was used for all statistical tests. For the regression analyses as well  
249 as for calculating the MT difference between the sequences with misaligned and aligned  
250 instruction we subtracted the mean performance for each participant and day (across  
251 sequences) to normalize and remove the large part of the variance due to interindividual  
252 performance differences.

### 253 *Probabilistic model for estimating chunk structure*

254 To estimate participants' chunking behavior from IPIs, we used an extended version of  
255 a Bayesian model of chunking behavior, developed by Acuna et al. (2014). The  
256 algorithm uses a Hidden Markov Model to estimate the posterior probability that a  
257 specific chunk structure is present on a given trial. Here we used only the IPIs on

258 correct trials, but not the error probability as in the original publication, as the probability  
259 of errors did not relate systematically to the imposed chunk structure early in learning.

260 As we had 10 digit transitions, each of which could either coincide with a chunk  
261 boundary or not, we had to consider  $2^{10}-1=1023$  possible chunk structures. Between  
262 trials, the hidden Markov process could either preserve the same chunk structure with  
263 probability  $p$  or switch to any other chunk structure with probability  $(1-p)/1022$ . The IPIs  
264 were modeled as a Gaussian random variable, with a different mean and variance  
265 depending on whether the keypress transition was within or between chunks.

266 In contrast to Acuna et al., in which learning effects were removed in a  
267 preprocessing step using a single exponential, we modeled learning within our model  
268 using two separate exponential terms for the IPI mean. This captured the faster  
269 reduction in the between- compared to the within-chunk intervals (Fig. 3a). The  
270 inclusion of separate learning curves for within- and between-chunk IPIs allowed us to  
271 estimate participants' chunk structure independently of changes in the overall  
272 performance speed (Fig. 5a). This is an important advance over previous methods that  
273 used a constant cutoff value to distinguish between within- and between-chunk  
274 intervals. For these methods, faster performance would automatically decrease the  
275 number of chunk boundaries detected. To confirm that our algorithm did not show this  
276 bias, we simulated artificial data using parameter estimates for individual participants.  
277 We simulated sequences that switched between 4 different chunk structures, each of  
278 which contained 4 chunks. Even though IPIs decreased by about 300 ms with learning,  
279 the estimated average number of chunks remained stable across the entire simulated  
280 experiment (average distance to single chunk: 3.35 ~ 4 chunks and 3 boundaries).



281 We used an Expectation-Maximization algorithm to simultaneously estimate the  
282 posterior probability of each chunk structure for each trial, as well as the 9 parameters  
283 of the model: 3 parameters each for the exponential curve for the within- and between-  
284 chunk IPIs, 1 variance parameter for each, and the transition probability  $p$  (for  
285 *implementation details*, see [https://github.com/jdiedrichsen/chunk\\_inference](https://github.com/jdiedrichsen/chunk_inference)).

286 As a preprocessing step, we regressed the IPIs for each subject against the  
287 average biomechanical profile, which was estimated as the average IPI profile for all  
288 possible 2-digit presses from our biomechanical baseline experiment (Fig. 1). The fitted  
289 values were removed from the IPIs. Removing temporal regularities that could be  
290 modeled with biomechanics alone should result in chunking estimates that more closely  
291 reflect cognitive and learning influences. Qualitatively comparable results were also  
292 obtained using the raw IPIs, without biomechanical factors removed.

### 293 *Expected distance*

294 We quantified how much participants changed their chunking behavior over time by  
295 calculating the expected distance between their estimated chunk structure and a  
296 reference chunk structure. We defined the distance between two chunk structures,  $d(i,j)$ ,  
297 as how many of the 10 keypress transitions would have to change from a chunk  
298 boundary to a non-boundary (and vice versa) to transform one structure into the other  
299 (for an example, see Fig. 5b). A distance of 0 would indicate no change. The average  
300 distance between two randomly chosen chunk structures is 5. Because chunk  
301 structures produced by participants on each trial were estimates, we calculated the  
302 expected distance. For this, we first calculated a 1023 X 1023 matrix containing the  
303 distances between any chunk structure  $i$ , and chunk structure  $j$ . From the posterior

304 probability distribution, we could then derive how likely each of these chunk structure  
305 changes was,  $p(i,j)$ . The expected value of the distance was then calculated as

$$306 \quad E(d) = \sum_{i=1}^{1023} \sum_{j=1}^{1023} p(i,j)d(i,j).$$

### 307 *Data availability*

308 The datasets generated and analyzed during the current study will be made available  
309 upon publication.

## 310 **Results**

311 Over 15 days we trained 32 participants to produce sequences of 11 isometric  
312 keypresses from memory on a keyboard-like device. Participants were rewarded with  
313 points for executing sequences as fast as possible while keeping the proportion of  
314 incorrect keypresses in each block of trials below 15%. We maintained the participants'  
315 motivation by gradually decreasing the movement time (MT) threshold at which they  
316 received points.

317 We manipulated how participants memorized the sequences by splitting the  
318 sequences into several chunks, each composed of 2-3 keypresses. The aim was to test  
319 whether the different ways of chunking (hereafter “chunk structures”) imposed through  
320 the chunk training in the induction phase (Methods, Fig. 2b) would affect performance  
321 optimization in the subsequent two weeks of training. Each sequence could be chunked  
322 in an aligned or misaligned fashion, predicted to lead to beneficial or detrimental  
323 performance respectively (Methods, Fig. 2c). All participants practiced the same 7  
324 sequences but differed in the chunking instructions they received for each sequence.

## 325 **Chunk induction induces a stable motor pattern**

326 To assess whether the imposed chunk structures influenced participants' motor  
327 behavior, we examined inter-press time intervals (IPIs). An increased IPI is commonly  
328 taken as a sign of a chunk boundary, as the cognitive processes (memory recall, action  
329 selection) involved in switching from one chunk to another require additional time  
330 (Verwey, 1999; Verwey et al., 2010). Hence, we would expect our participants to exhibit  
331 shorter IPIs between keypresses that belonged to a chunk imposed during day 1  
332 (within-chunk IPIs) and larger IPIs for the boundaries between chunks (between-chunk  
333 IPIs). For this analysis, we pooled the data from all sequences irrespective of instruction  
334 (misaligned vs. aligned). We indeed found significantly longer between-chunk IPIs  
335 compared to within-chunk IPIs in the first few days of training (Fig. 3a: days 2-4:  $t_{(31)} =$   
336  $7.728$ ,  $p = 5.098e-09$ ), suggesting that our manipulation was successful in inducing a  
337 temporally specific pattern of keypresses.

338 In the optimization phase, we ceased to cue sequences using the alphabetic  
339 letters associated with the chunks. Instead, participants were asked to recall the entire  
340 11-keypress sequences from memory in response to symbolic sequence cues (e.g. "\$").  
341 Across days 5-10, the within and between-chunk IPIs were still significantly different  
342 from each other;  $t_{(31)} = 7.165$ ,  $p = 2.351e-08$  (Fig. 3a). This difference cannot be  
343 attributed to biomechanical difficulty of the finger transitions, as the within-chunk IPIs for  
344 one half of the participants were the between-chunk IPIs for the other half and vice  
345 versa (Fig. 2b). IPIs that were within-chunk for all participants (e.g. the first and last IPI  
346 of a sequence) were excluded from this analysis. In summary, even though after day 4  
347 we cued the sequences only with symbols, participants persisted in performing the

348 sequences consistent with the chunk structures that we experimentally imposed early in  
349 training.

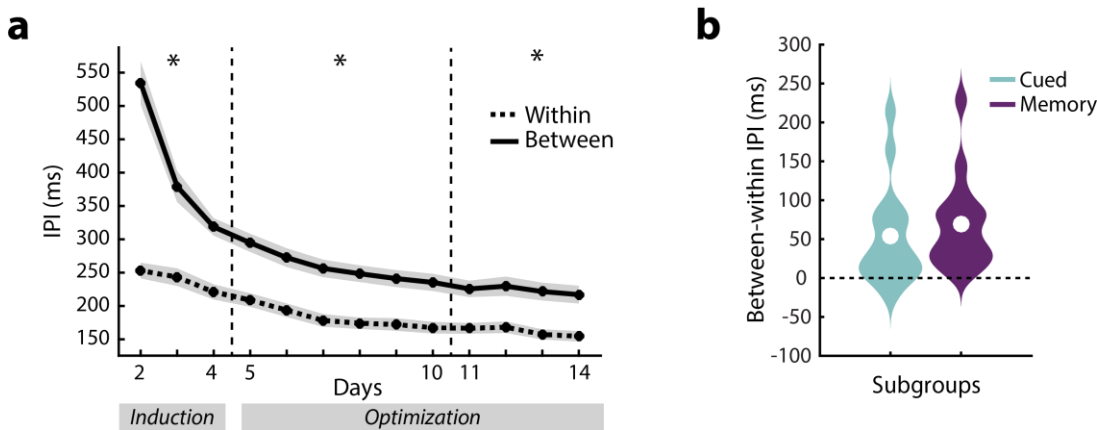

**Figure 3. Within- vs. between-chunk inter-press intervals (IPIs).** (a) Time course of IPIs that were within an instructed chunk (dashed line), or on the boundary between chunks (solid line). Asterisks indicate significant differences between average within- and between-chunk IPIs in the corresponding week (separated by dashed lines). Shaded area denotes between-subject standard error. (b) Difference of between- and within-chunk IPIs in the last week of training, split by whether participants had to recall the sequences from memory or were cued with the sequence numbers. Violin plots indicate distribution of individual participants, white circles indicate means.

350 In the last four days of training, we tested whether the persistence of the imposed  
351 chunk structure reflected a motor habit or whether it reflected memory recall. Half of the  
352 participants continued to perform the sequences from memory, while the other half were  
353 cued using the numbers that indicated the necessary keypresses (Fig. 2e), therefore  
354 removing any memory recall demands. Both the memory ( $t_{(15)} = 4.865$ ,  $p = 2.059e-04$ ,  
355 Fig. 3b) and the cued subgroup ( $t_{(15)} = 3.403$ ,  $p = 0.004$ ) showed a significant difference

356 between the within- and between-chunk IPIs and there was no reliable difference  
357 between the two subgroups in this effect ( $t_{(30)} = -0.749$ ,  $p = 0.460$ ). Thus, removing the  
358 requirement for memory recall did not abolish chunking. Because none of the  
359 subsequent analyses showed any significant difference between the two subgroups, we  
360 will report their combined results for the remainder of the article. Overall, these results  
361 suggest the explicit chunk training early in learning established a stable performance  
362 pattern that outlasted 10 days of subsequent practice.

### 363 **Misaligned chunk structure impairs performance**

364 To show that the initial instruction led to the emergence of a motor habit, we needed to  
365 not only show that this initial instruction induced a stable temporal pattern of IPIs, but  
366 also that this pattern was maintained even when it leads to slower execution speeds  
367 than other patterns. We therefore designed chunk structures that were predicted to be  
368 either beneficial or detrimental to performance (aligned vs. misaligned respectively)  
369 based on their biomechanical constraints (see Methods). Each participant learned 3 of  
370 the 7 sequences with a misaligned chunk structure and 3 sequences with an aligned  
371 chunk structure, with the assignment counterbalanced across participants (Fig. 2d). This  
372 counterbalanced design allowed us to compare execution speed between aligned and  
373 misaligned sequences for each participant.

374 To test our prediction that training with the misaligned chunk structure would lead  
375 to poorer performance, we measured participants' movement time (MT) by estimating  
376 the time between the first finger press and the last finger release. In the induction  
377 phase, sequences instructed with the misaligned chunk structure were performed  
378 slower than the sequences instructed with the aligned chunk structure (Fig. 4a) one-

379 sample t-test:  $t_{(31)} = 2.693$ ,  $p = 0.006$ ). Hence, we were not only able to manipulate how  
380 participants performed a sequence, but also how well they could perform it.

381           Examining what factors influenced the difference in speed we observed, we  
382 found that on average a within-chunk finger run led to an advantage of 28.6 ms and a  
383 within-chunk repetition cost 16 ms. An additional factor that influenced participants'  
384 speed was whether the 2-digit chunk was placed in the beginning (misaligned) or the  
385 end of the sequence (aligned), which led to an advantage of 24.7 ms. The difference in  
386 MT found in the first week was maintained in the second week of training (days 5-10:  
387  $t_{(31)} = 2.313$ ,  $p = 0.014$ ). Importantly, this shows that the stable pattern of IPIs indeed  
388 constitutes a motor habit. This speed difference was no longer statistically reliable in the  
389 last four days of training (days 11-14:  $t_{(31)} = 0.764$ ,  $p = 0.225$ ). This suggests that  
390 participants were able to overcome the “bad” habit of a misaligned chunk structure to  
391 some degree.

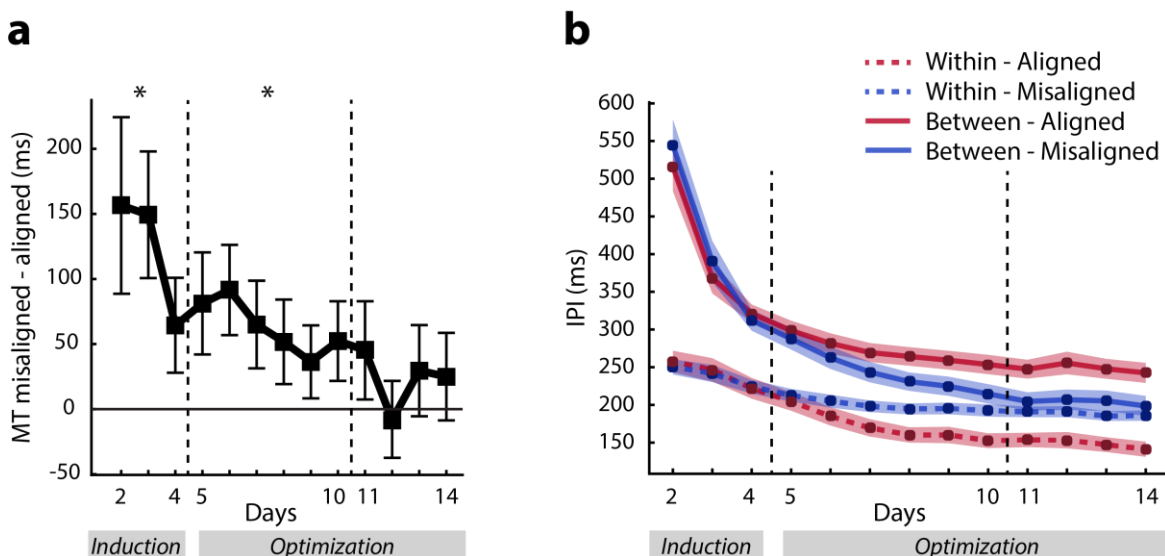

**Figure 4. Change in chunk structure and performance for aligned and misaligned instructed sequences. (a) Differences in movement time (MT) between sequences instructed with an aligned or misaligned chunk structure. Asterisk indicates a significant difference from 0 (no difference). (b) Within- or between-chunk IPIs across training days, separated by whether they were in the aligned or misaligned instructed sequences. Error bars denote between-subject standard error.**

### 392 Misaligned chunk structure is changed more rapidly

393 To investigate how participants overcame the detrimental influence of the misaligned  
 394 chunk structure, we first separated the IPI analysis (Fig. 3a) by whether the intervals  
 395 came from sequences that were instructed using an aligned or misaligned structure.  
 396 While the difference between within- and between-chunk IPIs for sequences  
 397 constructed using aligned chunk structures was stable over the entire training period,  
 398 the difference was absent for misaligned chunk structures in the last four days of  
 399 training (Fig. 4b). The three-way day x within/between x aligned/misaligned interaction  
 400 was significant ( $F_{(12,372)} = 19.790$ ,  $p = 1e-16$ ). Thus, in the last four days of training

401 participants diverged from the misaligned chunk structure while maintaining the aligned  
402 chunk structure.

403         A disadvantage of this analysis, however, is that we cannot discern how  
404 participants restructured their chunking and whether they completely abandoned the  
405 misaligned chunk structure. For a clearer understanding of how participants changed  
406 their chunk structure, we used a model-based approach to analyze our IPI data.

### 407 **Bayesian model of chunk behavior**

408 We used a Bayesian model to estimate the probability of each possible chunk structure  
409 given the observed series of IPIs on a trial-by-trial basis (Acuna et al., 2014). The state  
410 variable in this Hidden Markov Model represents which of the 1023 possible chunk  
411 structures is present on each trial. Using an expectation-maximization (EM) algorithm  
412 (Dempster et al., 1977; Welch, 2003), we simultaneously estimated the 9 free  
413 parameters of the model (for details see Methods), and the posterior probability for each  
414 possible chunk structure on each trial. We accounted for the effects of biomechanical  
415 difficulty by regressing out the patterns of IPIs across finger transitions predicted from  
416 our biomechanical dataset (Fig. 1) before modeling. Importantly, our model could  
417 capture separate learning-related changes to the within- and between-chunk intervals  
418 (Fig. 5a). Our method, therefore, allowed us to estimate participants' chunk structure  
419 independently of the overall speed of performance.

420         Figure 5b shows two examples of individual participants and sequences. In the  
421 first panel, the participant chunked the sequence according to the initial instructions at  
422 first, then inserted 1 or 2 additional chunk boundaries, and at the end of training



423 performed the sequence as a single chunk. In comparison, the other participant  
 424 maintained the instructed chunk structure for most of the training period.

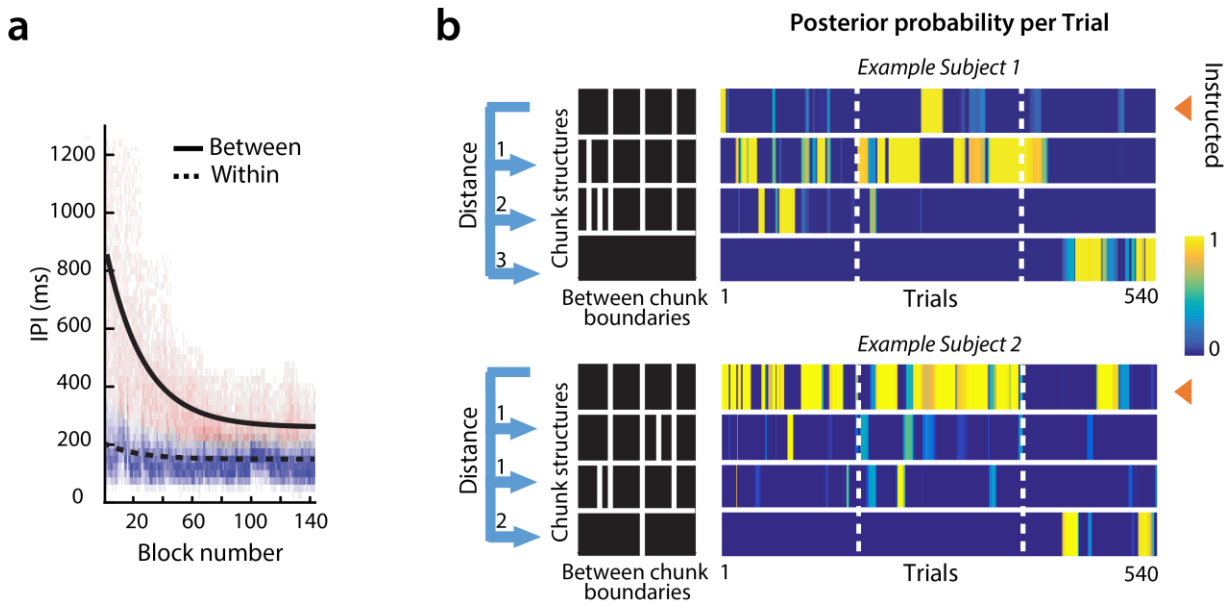

**Figure 5. Probabilistic chunking model fitted to example participant data. (a)** The change of within- and between-chunk IPIs were modeled using two separate exponential functions across training. The density plot shows individual IPIs, with the color indicating the probability of a between- (pink) or within-chunk interval (blue). **(b)** Posterior probability for two example participants (for one sequence per participant) over the course of the experiment. Only the 4 most likely chunk structures out of the 1023 possible structures are shown. The color scale indicates the posterior probability of a given chunk structure for each trial - with yellow indicating higher probabilities. The dashed vertical lines indicate the boundaries between training phases (Days 2-4; 5-10 & 11-14). The black box (left) indicates the chunk boundaries as white lines within the 11-press sequence (max. 10 boundaries) for the chosen chunk structures. The first row indicates the instructed chunk structure (arrow). The other three rows illustrate other chunk structures that were highly probable at some point during the experiment. The distance measure expresses how many chunks need to be added or removed to transform one structure (in this case the instructed chunk structure) into the other.

425           To characterize changes in chunk structure over training we defined a metric that  
426   quantified the difference between any two chunking structures. The metric is based on  
427   counting the number of chunk boundaries that differ, in other words, the number of  
428   chunks that would need to be split or merged to transform one chunk structure into the  
429   other (Fig. 5b - distance). We then used this measure to calculate, on each trial, the  
430   distance between the chunk structure estimated for the participant and three reference  
431   structures of interest: (1) the aligned-, (2) misaligned, and (3) a structure that consisted  
432   of a single chunk. These distances defined a coordinate system that enabled us to  
433   visualize changes in chunk structure over training. We then projected participants'  
434   estimated chunk structures into this space (Fig. 6a). On the horizontal axis is the  
435   expected distance of participants' chunk structure to the single-chunk structure. Given  
436   our definition of distance, this measure simply counts the number of chunk boundaries.  
437   The vertical axis indicates how close the estimated chunk structure is to the aligned and  
438   misaligned chunk structure, respectively.

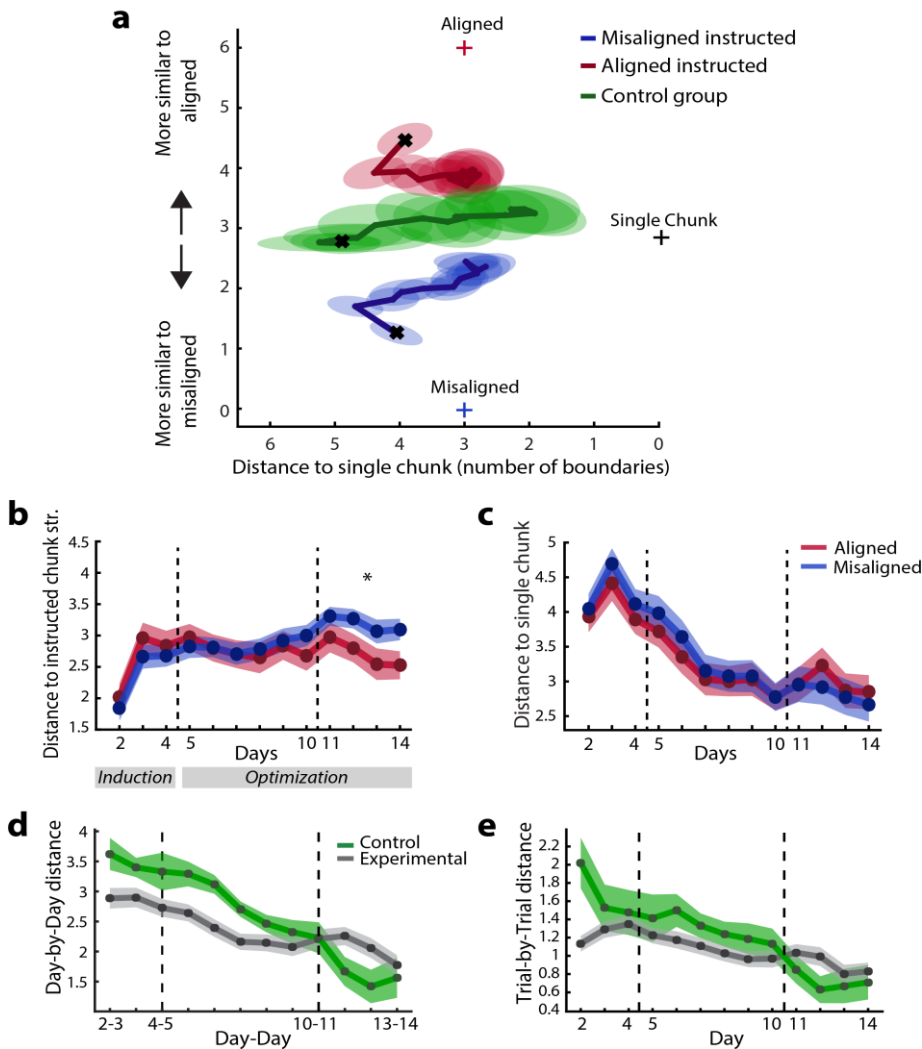

**Figure 6. Changes in chunk structure with learning. (a)** The average chunk structure over 13 days of practice for aligned (red) and misaligned (blue) instructed sequences for the experimental participants. The results of the control group are shown in green. The horizontal axis represents the distance to the single-chunk structure, i.e. the number of chunk boundaries. The vertical axis shows the distance to the aligned or misaligned chunk structure. The crosses indicate the positions of the three reference structures (aligned, misaligned and single). Ellipses denote the between-subject standard error. **(b)** Average distance of participants' chunk structure to the instructed chunk structure. **(c)** Distance to the single chunk structure across days. **(d)** Day-by-day changes in chunk structure. **(e)** Trial-by-trial changes in chunk structures within each day. Error bars indicate between-subject standard error.

#### 440 **Participants abandoned the misaligned faster than aligned chunk structure**

441 Using this modeling approach, we probed how much participants diverged from the  
442 initial instructions and whether they diverged from the misaligned chunk structure to a  
443 greater degree as already suggested by our IPI analysis. Participants slowly changed  
444 their chunk structure for both aligned and misaligned instructed sequences with training.  
445 The average distance to the instructed chunk structure increased systematically over  
446 time (repeated measures ANOVA, effect of day,  $F_{(12,372)} = 7.055$ ,  $p < 1e-16$ , Fig. 6b).

447 Consistent with our IPI analysis (Fig. 4b), we observed that participants  
448 abandoned the instructed misaligned chunk structure to a greater degree than the  
449 aligned chunk structure (Day x Instruction interaction:  $F_{(12,372)} = 5.610$ ,  $p < 1e-16$ ). In the  
450 last four days of training, sequences with the misaligned chunk structure were more  
451 dissimilar to the instructed chunk structure than sequences with an aligned chunk  
452 structure:  $t_{(31)} = 2.294$ ,  $p = 0.029$  (Fig. 6b). Additionally, we found a significant Day x  
453 Instruction interaction ( $F_{(12,372)} = 2.215$ ,  $p = 0.011$ ) for the distance to a single chunk  
454 (Fig. 6c), suggesting a stronger tendency towards performing a sequence as a single  
455 chunk when trained on the misaligned chunk structure. Together these results indicate  
456 that participants changed their chunking behavior more readily for sequences that were  
457 trained using the misaligned chunk structure than when trained using the aligned chunk  
458 structure.

459 Despite the divergence from the misaligned chunk structure with training, our  
460 analysis also revealed that participants did not overcome the influence of the instruction  
461 completely. In the third week, sequences trained with a misaligned chunk structure were  
462 still performed using a chunk structure that was closer to the misaligned structure than

463 to the aligned structure ( $t_{(31)} = 6.962$ ,  $p < 1e-16$ ). This shows that training with a  
464 misaligned chunk structure had a lasting influence on participants' motor behavior.

### 465 **Movement towards a single chunk structure**

466 Previous literature has suggested that with training, participants group smaller chunks  
467 together to form new larger chunks (Verwey, 1996; Sakai et al., 2003; Kuriyama et al.,  
468 2004; Verstynen et al., 2012; Wymbs et al., 2012; Song and Cohen, 2014; Ramkumar  
469 et al., 2016), a process that may help to improve performance (Verwey, 1999, 2001;  
470 Verwey et al., 2010; Abrahamse et al., 2013; Verwey and Wright, 2014; Ramkumar et  
471 al., 2016). However, in nearly all previous studies the estimated number of chunks is  
472 biased by the overall movement speed. As verified by simulations (see Methods), our  
473 probabilistic model was able to disambiguate the two factors. We estimated the number  
474 of chunk boundaries for each participant averaged across sequences (the neutral  
475 sequence was excluded). On the 2<sup>nd</sup> day, participants separated sequences into more  
476 chunks than the 4 chunks we instructed (Fig. 6c,  $t_{(31)} = 4.224$ ,  $p = 0.0002$ ). This  
477 tendency continued on day 3, on which participants tended to subdivide the sequences  
478 into even smaller chunks (day 2 vs. 3:  $t_{(31)} = 2.023$ ,  $p = 0.052$ ). After day three the  
479 number of chunk boundaries decreased as shown by a significant effect of day in a  
480 repeated measures ANOVA ( $F_{(11,341)} = 11.710$ ,  $p < 1e-16$ ). However, even in the last  
481 phase of training, participants performed the sequences with an average of 2.9 chunk  
482 boundaries (we instructed 3 chunk boundaries). Thus, while there was a clear tendency  
483 towards merging chunks after an initial increase, participants did not perform the  
484 sequence as a single chunk, even after 3 weeks of practice.

## 485 **Chunk structure crystallizes with training**

486 Would longer training allow participants to completely overcome the influence of the  
487 instruction and to perform all sequences as a single chunk? Although experiments with  
488 longer training are necessary to provide a definitive answer, our data indicate that this  
489 process, if occurring, may take a very long time. The amount of change in the chunk  
490 structure for each sequence reduced dramatically in the last week of training,  
491 suggesting that a stable motor habit formed. This phenomenon is akin to the  
492 development of an invariant temporal and spectral structure in bird-song, a process that  
493 has been termed “crystallization” (Brainard and Doupe, 2002). As a measure of  
494 crystallization, we calculated the distance between the chunk structures from one day to  
495 the next (Fig. 6d) and within each day from one trial to the next (Fig. 6e). The analysis  
496 was performed separately for each sequence and participant. Overall, both the day-to-  
497 day distance ( $F_{(11,330)} = 18.794$ ,  $p < 1e-16$ ) and the trial-by-trial distance decreased  
498 significantly across training days ( $F_{(12,456)} = 13.245$ ,  $p < 1e-16$ ). Therefore, participants  
499 appeared to settle onto a stable pattern in the last week. Consequently, additional  
500 training would likely only lead to slow changes in their chunk pattern.

501 In summary, our analyses provide a clear representation of how chunking  
502 changes with learning. Firstly, participants diverged from the instructions over time with  
503 a quicker deviation from the misaligned chunk structure. Secondly, in line with previous  
504 research (Verwey, 1996; Sakai et al., 2003; Kuriyama et al., 2004; Verstynen et al.,  
505 2012; Wymbs et al., 2012; Song and Cohen, 2014; Ramkumar et al., 2016) participants  
506 gradually moved towards performing the sequence as a single chunk by dividing the  
507 sequence into fewer chunks. Nevertheless, they did not completely overcome the initial

508 instruction, nor did they perform the sequences as a single chunk at the end of training.  
509 Considering that the chunk structure crystallized in the last four days of training, these  
510 results demonstrate the formation of a stable motor habit that is still influenced by the  
511 initial instruction.

## 512 **Spontaneously emerging chunk structures**

513 To investigate how participants might spontaneously chunk the sequences, we tested  
514 an additional control group (N=8), who did not receive any explicit chunk training.  
515 Participants were presented with the sequences in entirety on the first day and were  
516 asked to memorize them without any reference to chunks (see Methods for details).  
517 Even though memorization was more difficult, the control group did not differ  
518 significantly from the experimental groups in terms of their explicit knowledge on day 4  
519 ( $t_{(36)} = 1.288$ ,  $p = 0.206$ ), or in their overall MT across training (main effect of group:  
520  $F_{(1,38)} = 0.101$ ,  $p = 0.753$ ; interaction between group and day ( $F_{(1,38)} = 1.387$ ,  $p =$   
521  $0.168$ ).

522         Similar to the experimental groups, the control group initially subdivided the  
523 sequences into small chunks and then slowly combined them into larger chunks. The  
524 distance to a single chunk structure decreased significantly over days ( $F_{(12,84)} = 17.977$ ,  
525  $p < 1e-16$ , Fig. 6a), and reached a level that was not statistically different from the  
526 experimental participants on the last day of training ( $t_{(38)} = -0.940$ ,  $p = 0.353$ ).  
527 Interestingly, on the first day, the control group performed the sequences closer to the  
528 misaligned chunk structure than to the aligned chunk structure ( $t_{(7)} = -2.799$ ,  $p = 0.027$ ).  
529 With training, participants then moved closer to the aligned chunk structure, as indicated  
530 by a significant change in the difference between the distance to the aligned and

531 misaligned chunk structure across days ( $F_{(12,84)} = 5.303$ ,  $p < 1e-16$ ). The control group  
532 also showed clear crystallization over time (see Figure 6d&e). Compared to the  
533 experimental groups, control participants showed a higher day-to-day and trial-by-trial  
534 change in the beginning of training, which then reduced more quickly (Group x Day  
535 interaction; day-to-day:  $F_{(11,330)} = 3.780$ ,  $p = 4.003e-05$ ; trial-by-trial:  $F_{(12,456)} = 4.254$ ,  $p =$   
536  $2.167e-06$ ). In summary, the control group showed similar behavioral patterns to the  
537 experimental participants, indicating that similar processes of habit formation are also at  
538 play in the absence of explicit instructions.

### 539 **Idiosyncratic chunk structures at the end of training and their importance to** 540 **performance**

541 Finally, we analyzed how the final chunk structure that participants adopted for each  
542 sequence influenced their performance after 3 weeks of training. We visualized this  
543 relationship by plotting the chunk structure for each sequence and participant in the 2-  
544 dimensional space defined in earlier Fig. 6a, with the corresponding average MT  
545 indicated by the size of the symbol (Fig. 7).

546 The first insight is that participants used quite diverse chunk structures. To show  
547 that this is not due to within-subject variability of performance, we compared  
548 participants' within-subject variation in IPI patterns for each sequence across even and  
549 odd trials (in the last three days of training) to the between-subject variation in IPI  
550 patterns for each sequence. We found that the between-subject variability was much  
551 higher than the within-subject variability ( $t_{(31)} = 36.130$ ,  $p < 1e-16$ ). This clearly shows  
552 that participants developed their own, idiosyncratic way of chunking each sequence,  
553 which is not fully dictated by the biomechanical requirements of the sequence. With this



554 result in mind, we asked whether these individual differences relate to differences in  
555 final performance.

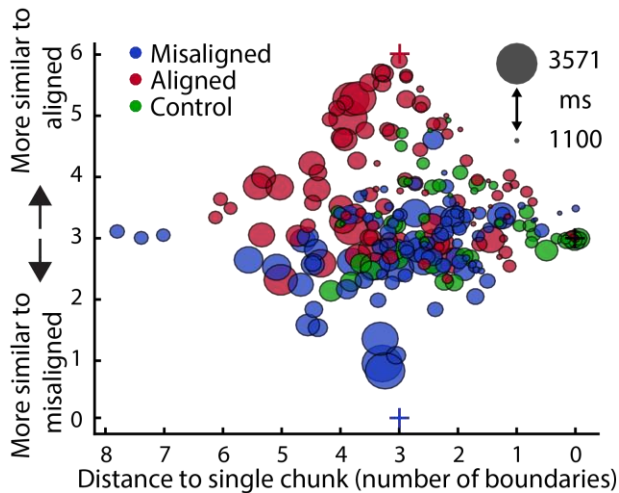

**Figure 7. Relationship between chunking and speed (days 11-14).** The x-axis indicates the distance to a single chunk and the y-axis the relative distance to the two instructed chunk structures. Each data point indicates the average chunk structure and MT of a single sequence and participant in the last four days of training. The diameter of each circle represents the MT with larger circles indicating slower performance.

556

557 Figure 7 suggests, that performance was better for sequences that were closer to the  
558 aligned chunk structure. To statistically test whether this finding holds true within each  
559 individual, we regressed the MT for 6 sequences (last 4 days & excluding the control  
560 sequence) for each participant in the last four days of training against the corresponding  
561 distance to the aligned chunk structure. On average the individual slopes were

562 significantly greater than 0, both for the experimental (Fig. 8a;  $t_{(31)} = 2.220$ ,  $p = 0.017$ ),  
563 and control group (Fig. 8b,  $t_{(7)} = 2.720$ ,  $p = 0.015$ ). Thus, finding a better way of  
564 chunking (for the same number of chunk boundaries) improved performance.

565         Secondly, Fig. 7 also suggests, that performing the sequence with a reduced  
566 number of chunks is beneficial for performance. We regressed the MT for 6 sequences  
567 (last 4 days & excluding the control sequence) against the corresponding distance to  
568 the single chunk structure to (Fig. 8c). The majority of the participants showed a positive  
569 relationship between the number of chunks and MT: a one-sample t-test indicated that  
570 the individual slopes were significantly greater than 0 ( $t_{(31)} = 6.104$ ,  $p = 4.560e-07$ ). This  
571 relationship was also found for the control participants (Fig. 8d,  $t_{(7)} = 3.429$ ,  $p = 0.006$ ).  
572 Thus, performing the sequences with fewer chunks led to better performance. Note that  
573 for both analyses, the chunk structure can be determined independently from the overall  
574 performance criterion (MT, see Methods).

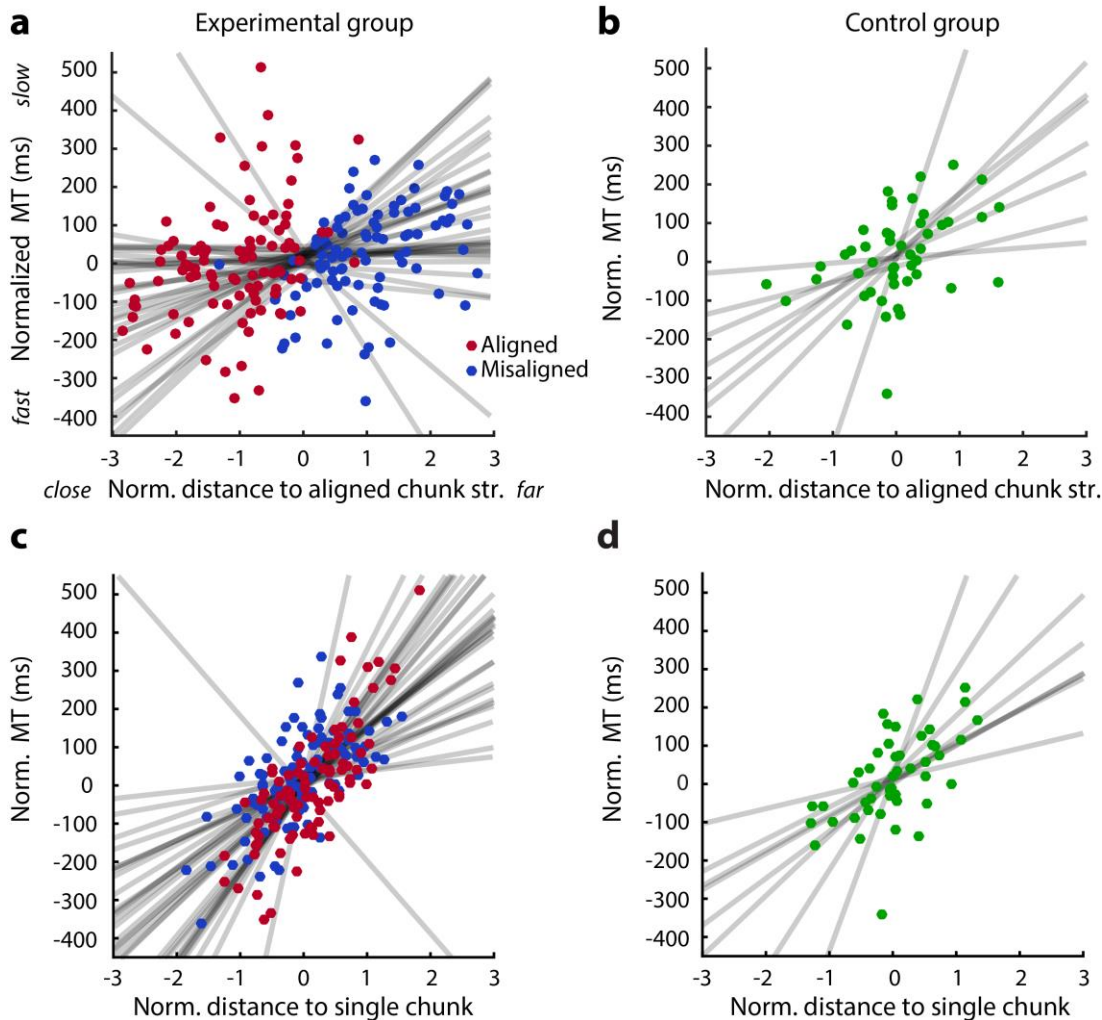

**Figure 8. Relationship between the distance to the aligned/single chunk structure and MT. (a)** Scatterplot between the normalized (per subj.) distance to the aligned chunk structure and normalized MT in the last four days of practice. A separate regression line is fitted to the 6 sequences for each participant. Red dots indicate sequences with aligned instructions, blue dots sequences with misaligned chunking instructions. **(b)** Same as **a** but for the control group. **(c&d)** same as **a** & **b** but for the normalized distance to a single chunk.

575 Overall, these results suggest that the two optimization processes - joining  
576 chunks and aligning the remaining chunk boundaries with biomechanical constraints -

577 positively influenced participants' ultimate performance. Sequences for which  
578 participants could not develop a better way of chunking were performed substantially  
579 slower.

## 580 **Discussion**

581 In this study, we utilized chunking as a tool to investigate the role of motor habits in skill  
582 learning. We influenced the structure of the initial declarative sequence representation  
583 by manipulating how participants memorized them (Park, Wilde, & Shea, 2004). By  
584 experimentally imposing two different chunk structures on the same physical sequence,  
585 we could make causal inferences about the effects of cognitive chunking on motor skill  
586 development. This is an important advance over previous observational studies (Wright  
587 et al., 2010; Wymbs et al., 2012; Ramkumar et al., 2016), which did not experimentally  
588 control how participants chose to chunk sequences.

589 We report three main results. First, consistent with previous studies (de Kleine &  
590 Verwey, 2009; Verwey et al., 2010, 2009; Verwey & Dronkert, 1996), our data  
591 demonstrate that a stable chunking pattern can be induced through cognitive  
592 manipulations during the initial stages of sequence learning. Importantly, participants  
593 did not completely overcome this imposed chunk structure, even after 2 weeks of  
594 additional training. Participants' chunk structure crystallized towards the end of training,  
595 making it unlikely that the influence of the initial instruction would disappear completely  
596 with longer practice. Finally, the chunking structure remained stable, even when the  
597 task changed from a memory-guided to a stimulus-guided task. Thus, the initial  
598 instruction led to the formation of specific motor patterns that were still clearly  
599 measurable after three weeks of training.

600           Second, we tested whether this stable pattern of chunking could be considered a  
601 motor habit. To do so, we designed two different ways of instructing the sequence, one  
602 aligned and the other misaligned with biomechanical influences. This manipulation  
603 either facilitated or impeded performance in the first two weeks of practice. We showed  
604 that participants did not overcome the misaligned structure completely, even though it  
605 was detrimental to their performance. Thus, the stable chunking pattern meets the  
606 requirements (as laid out in our definition) for being called a motor habit. Therefore, we  
607 believe that studying sequential chunking can provide valuable insights into the neural  
608 systems underlying motor habits. Indeed, it has recently been suggested that chunking  
609 plays an integral role in the formation and expression of habits (Dezfouli, Lingawi, &  
610 Balleine, 2014; Graybiel, 2008) and is neurally represented in the dorsal lateral striatum  
611 as action “start and stop signals” (Barnes, Kubota, Hu, Jin, & Graybiel, 2005; Graybiel,  
612 1998; Jin, Tecuapetla, & Costa, 2014; Smith & Graybiel, 2013a, 2014).

613           Finally, our results also indicate that the motor habit was not completely  
614 immutable. Participants were able to modify the misaligned chunk structure and did so  
615 more rapidly than the aligned chunk structure. As a consequence, the performance  
616 detriment imposed by the misaligned instruction was no longer significant on the group  
617 level in the last week of training.

618           We identified two ways in which participants overcame the limitation induced by  
619 the bad habit. After initially breaking up the instructed sequences into 5 chunks on  
620 average, participants then joined chunks together, and by doing so, decreasing the  
621 amount of additional time spent on chunk boundaries. While previous research has  
622 suggested that the size of chunks increases with training, these findings were usually

623 conflated with the overall speed of the action (Wymbs et al., 2012; Song and Cohen,  
624 2014; Solopchuk et al., 2016). Using a Bayesian model to assess chunk structure  
625 independent of performance, we demonstrated a positive relationship between chunk  
626 concatenation and execution speed, both in the experimental as well as in the control  
627 group that developed a chunking strategy without explicit instructions. However, our  
628 results also indicate that participants did not merge all sequences into a single chunk  
629 after 3 weeks of training, but on average subdivided each sequence into 3-4 chunks.  
630 This suggests that the number of motor actions that can be joined in a single chunk may  
631 be limited (Verwey et al., 2002; Verwey and Eikelboom, 2003; Langan and Seidler,  
632 2011; Ramkumar et al., 2016).

633         We found that participants also optimized performance by rearranging chunk  
634 boundaries in a biomechanically efficient manner. Consistent with our prediction based  
635 on the difficulty of individual digit transitions, placing chunk boundaries at digit  
636 transitions that take more time to execute and combining finger presses that are  
637 adjacent resulted in faster performance for the full sequence. This optimization process  
638 was also observable in the control group that memorized and practiced sequences on  
639 their own terms.

640         Conversely, we observed that sequences that were not chunked in line with  
641 these strategies were performed slower. Therefore, if a more beneficial way of chunking  
642 was not found, participants still produced sequences using longer movement times,  
643 suggesting that other learning mechanisms did not fully make up for a persistent motor  
644 habit. Considering that participants' behavior became highly invariant in the last week of

645 practice, we predict that some motor habit will remain and continue to influence  
646 participants' performance even after prolonged training.

647 In many motor tasks, there are numerous strategies and processes that can lead  
648 to excellent performance (Verwey et al., 2010; Verstynen et al., 2012). Examining  
649 Figure 7, one can observe that the shortest MTs were achieved anywhere in the space  
650 between the aligned and single chunk structure. Occasionally, good performance was  
651 also reached in other locations in chunk space. Our analysis showed that participants  
652 adopted quite idiosyncratic chunk structures for each sequence at the end of training.  
653 This suggests that there is considerable inter-individual variability in which technique  
654 works best for reaching a high level of performance. Part of these differences may  
655 reflect biomechanical variation across participants, leading to slightly different optimal  
656 solutions. Alternatively, these differences may be learning-related. A number of ways of  
657 chunking may work approximately equally well, such that the cost of changing an  
658 established habit may outweigh the small benefit that could be gained from changing  
659 the structure. A similar observation can be made in sports, where even top-ranked  
660 athletes use slightly different techniques to reach similar levels of performance.

661 The establishment of a novel experimental paradigm to study motor habit  
662 formation will allow us to explore ways to encourage learners to abandon or change a  
663 current habit. While our attempt at accelerating this process by changing the task from a  
664 memory-based to a stimulus-based task was ultimately not successful, there are many  
665 other techniques that would be possible. In many disciplines, teachers have developed  
666 ways to help students overcome habits. For instance, the Hanon piano exercise helps  
667 students play difficult passages of a musical piece by breaking up learned phrases into

668 new chunks to explore different rhythms. Playing a passage slower than intended has  
669 also been suggested to break habits (Chang, 2016). Overall, the general advice from  
670 the diverse literature on learning piano is to diversify training and to practice with careful  
671 awareness to prevent habits from forming (Sadnicka et al., 2017). This suggests that  
672 changes in context and the exploration of novel ways of moving can aid performance  
673 and the abandonment of habits.

674         While our experimental design enabled us to manipulate participants' habits in a  
675 laboratory setting, sequence learning only captures a specific aspect of motor skill  
676 acquisition. Nevertheless, similar persistence of habits has been observed in other  
677 motor learning paradigms (Diedrichsen, White, Newman, & Lally, 2010). In bimanual  
678 coordination, for instance, Park, Dijkstra and Sternard (2013) showed that an acquired  
679 pattern stayed remarkably stable even over 8 years of not performing the task.

680         The current study shows that motor habits can be cognitively induced and can  
681 remain stable for extended time periods, even though they may prevent further  
682 performance gains. Furthermore, the study provides the first insights into potential  
683 learning processes that are involved in overcoming a detrimental habit. Our  
684 experimental paradigm allows the further study of how we can aid the abandonment of  
685 bad habits.

686



687

## References

- 688 Abrahamse EL, Ruitenberg MFL, de Kleine E, Verwey WB (2013) Control of automated  
689 behavior: insights from the discrete sequence production task. *Front Hum Neurosci*  
690 7:1–16.
- 691 Acuna DE, Wymbs NF, Reynolds CA, Picard N, Turner RS, Strick PL, Grafton ST,  
692 Kording KP (2014) Multifaceted aspects of chunking enable robust algorithms. *J*  
693 *Neurophysiol* 112:1849–1856.
- 694 Adams CD (1982) Variations in the sensitivity of instrumental responding to reinforcer  
695 devaluation. *Q J Exp Psychol Sect B* 34:77–98.
- 696 Ashby FG, Ell SW, Waldron EM (2003) Procedural learning in perceptual categorization.  
697 *Mem Cogn* 31:1114–1125.
- 698 Barnes TD, Kubota Y, Hu D, Jin DZ, Graybiel AM (2005) Activity of striatal neurons  
699 reflects dynamic encoding and recoding of procedural memories. *Nature* 437:1158–  
700 1161.
- 701 Bo J, Seidler RD (2009) Visuospatial working memory capacity predicts the organization  
702 of acquired explicit motor sequences. *J Neurophysiol* 101:3116–3125.
- 703 Brainard MS, Doupe AJ (2002) What songbirds teach us about learning. *Nature*  
704 417:351–358.
- 705 Chang CC (2016) *Fundamentals of Piano Practice*, 3rd ed. CreateSpace Independent  
706 Publishing Platform.
- 707 Dempster AP, Laird NM, Rubin DB (1977) Maximum likelihood from incomplete data via  
708 the EM algorithm. *J R Stat Soc Ser B Methodol* 39:1–38.
- 709 Dezfouli A, Balleine BW (2012) Habits, action sequences and reinforcement learning.  
710 *Eur J Neurosci* 35:1036–1051.
- 711 Dezfouli A, Lingawi NW, Balleine BW (2014) Habits as action sequences: hierarchical  
712 action control and changes in outcome value. *Philos Trans R Soc B Biol Sci*

- 713 369:20130482–20130482.
- 714 Dickinson A (1985) *Actions and Habits: The Development of Behavioural Autonomy*.  
715 *Philos Trans R Soc B Biol Sci* 308:67–78.
- 716 Diedrichsen J, Kornysheva K (2015) Motor skill learning between selection and  
717 execution. *Trends Cogn Sci* 19:227–233.
- 718 Diedrichsen J, White O, Newman D, Lally N (2010) Use-Dependent and Error-Based  
719 Learning of Motor Behaviors. *J Neurosci* 30:5159–5166.
- 720 Ericsson KA et al. (1993) The role of deliberate practice in the acquisition of expert  
721 performance. *Psychol Rev* 100:363–406.
- 722 Graybiel AM (1998) The basal ganglia and chunking of action repertoires. *Neurobiol*  
723 *Learn Mem* 70:119–136.
- 724 Graybiel AM (2008) Habits, Rituals, and the Evaluative Brain. *Annu Rev Neurosci*  
725 31:359–387.
- 726 Graybiel AM, Grafton ST (2015) The Striatum: Where Skills and Habits Meet. *Cold*  
727 *Spring Harb Perspect Biol* 7:a021691.
- 728 Haith AM, Krakauer JW (2018) The multiple effects of practice: skill, habit and reduced  
729 cognitive load. *Curr Opin Behav Sci* 20:196–201.
- 730 Halford GS, Wilson WH, Phillips S (1998) Processing capacity defined by relational  
731 complexity: implications for comparative, developmental, and cognitive psychology.  
732 *Behav Brain Sci* 21:803–864.
- 733 Hardwick RM, Forrence AD, Krakauer JW, Haith AM (2019) Time-dependent  
734 competition between goal-directed and habitual response preparation. *Nat Hum*  
735 *Behav* 3:1252–1262.
- 736 Hayes JR (2013) *The Complete Problem Solver*. Taylor & Francis.
- 737 Hélié S, Waldschmidt JG, Ashby FG (2010) Automaticity in rule-based and information-

- 738 integration categorization. *Attention, Perception, Psychophys* 72:1013–1031.
- 739 Jager W (2003) Breaking ‘ bad habits ’: a dynamical perspective on habit. *Hum Decis*  
740 *Mak Environ Percept Underst Assist Hum Decis Mak Real-Life Settings* (L  
741 Hendrickx, W Jager, L Steg, eds), *Lib Amicorum Charles Vlek*, Univ Groningen,  
742 Groningen, Netherlands:149–160.
- 743 Jin X, Tecuapetla F, Costa RM (2014) Basal ganglia subcircuits distinctively encode the  
744 parsing and concatenation of action sequences. *Nat Neurosci* 17:423–430.
- 745 Jog MS, Kubota Y, Connolly CI, Hillegaart V, Graybiel AM (1999) Building Neural  
746 Representations of Habits. *Science* (80- ) 286:1745–1749.
- 747 Kleine E De, Verwey WB (2009) Representations underlying skill in the discrete  
748 sequence production task: effect of hand used and hand position. *Psychol Res*  
749 *Psychol Forsch* 73:685–694.
- 750 Kuriyama K, Stickgold R, Walker MP (2004) Sleep-dependent learning and motor-skill  
751 complexity. *Learn Mem* 11:705–713.
- 752 Langan J, Seidler RD (2011) Age differences in spatial working memory contributions to  
753 visuomotor adaptation and transfer. *Behav Brain Res* 225:160–168.
- 754 Miller GA (1956) The magical number seven, plus or minus two: some limits on our  
755 capacity for processing information. *Psychol Rev* 63:81–97.
- 756 Moors A, De Houwer J (2006) Automaticity: A Theoretical and Conceptual Analysis.  
757 *Psychol Bull* 132:297–326.
- 758 Park J-H, Wilde H, Shea CH (2004) Part-Whole Practice of Movement Sequences. *J*  
759 *Mot Behav* 36:51–61.
- 760 Park S-W, Dijkstra TMH, Sternad D (2013) Learning to never forget—time scales and  
761 specificity of long-term memory of a motor skill. *Front Comput Neurosci* 7:1–13.
- 762 Ramkumar P, Acuna DE, Berniker M, Grafton ST, Turner RS, Kording KP (2016)  
763 Chunking as the result of an efficiency computation trade-off. *Nat Commun*

- 764 7:12176.
- 765 Robbins TW, Costa RM (2017) Habits. *Curr Biol* 27:R1200–R1206.
- 766 Sadnicka A, Kornysheva K, Rothwell JC, Edwards MJ (2017) A unifying motor control  
767 framework for task-specific dystonia. *Nat Rev Neurol* 14:116–124.
- 768 Sakai K, Kitaguchi K, Hikosaka O (2003) Chunking during human visuomotor sequence  
769 learning. *Exp Brain Res* 152:229–242.
- 770 Seger CA, Spiering BJ (2011) A critical review of habit learning and the Basal Ganglia.  
771 *Front Syst Neurosci* 5:1–9.
- 772 Seidler RD, Bo J, Anguera JA (2012) Neurocognitive contributions to motor skill  
773 learning: The role of working memory. *J Mot Behav* 44:445–453.
- 774 Smith KS, Graybiel AM (2013a) Using optogenetics to study habits. *Brain Res*  
775 1511:102–114.
- 776 Smith KS, Graybiel AM (2013b) A dual operator view of habitual behavior reflecting  
777 cortical and striatal dynamics. *Neuron* 79:361–374.
- 778 Smith KS, Graybiel AM (2014) Investigating habits: strategies, technologies and  
779 models. *Front Behav Neurosci* 8:1–17.
- 780 Smith KS, Graybiel AM (2016) Habit formation coincides with shifts in reinforcement  
781 representations in the sensorimotor striatum. *J Neurophysiol* 115:1487–1498.
- 782 Solopchuk O, Alamia A, Olivier E, Ze A, Zénon A (2016) Chunking improves symbolic  
783 sequence processing and relies on working memory gating mechanisms. *Learn*  
784 *Mem* 23:108–112.
- 785 Song S, Cohen L (2014) Impact of conscious intent on chunking during motor learning.  
786 *Learn Mem* 21:449–451.
- 787 Verstynen T, Phillips J, Braun E, Workman B, Schunn C, Schneider W (2012) Dynamic  
788 Sensorimotor Planning during Long-Term Sequence Learning: The Role of

- 789 Variability, Response Chunking and Planning Errors Balasubramaniam R, ed.  
790 PLoS One 7:e47336.
- 791 Verwey WB (1996) Buffer loading and chunking in sequential keypressing. *J Exp*  
792 *Psychol Hum Percept Perform* 22:544–562.
- 793 Verwey WB (1999) Evidence for a multistage model of practice in a sequential  
794 movement task. *J Exp Psychol Hum Percept Perform* 25:1693–1708.
- 795 Verwey WB (2001) Concatenating familiar movement sequences: The versatile  
796 cognitive processor. *Acta Psychol (Amst)* 106:69–95.
- 797 Verwey WB, Abrahamse EL, de Kleine E (2010) Cognitive processing in new and  
798 practiced discrete keying sequences. *Front Psychol* 1:32.
- 799 Verwey WB, Abrahamse EL, Jiménez L (2009) Segmentation of short keying  
800 sequences does not spontaneously transfer to other sequences. *Hum Mov Sci*  
801 28:348–361.
- 802 Verwey WB, Dronkert Y (1996) Practicing a Structured Continuous Key-Pressing Task:  
803 Motor Chunking or Rhythm Consolidation? *J Mot Behav* 28:71–79.
- 804 Verwey WB, Eikelboom T (2003) Evidence for Lasting Sequence Segmentation in the  
805 Discrete Sequence-Production Task. *J Mot Behav* 35:171–181.
- 806 Verwey WB, Lammens R, Honk J Van (2002) On the role of the SMA in the discrete  
807 sequence production task: a TMS study. *Neuropsychologia* 40:1268–1276.
- 808 Verwey WB, Wright DL (2014) Learning a keying sequence you never executed:  
809 Evidence for independent associative and motor chunk learning. *Acta Psychol*  
810 (Amst) 151:24–31.
- 811 Welch LR (2003) Hidden Markov Models and the Baum-Welch Algorithm. *IEEE Inf*  
812 *Theory Soc Newsl* 53:1,10-13.
- 813 Wickens JR, Horvitz JC, Costa RM, Killcross S (2007) Dopaminergic Mechanisms in  
814 Actions and Habits. *J Neurosci* 27:8181–8183.

- 815 Wiestler T, Diedrichsen J (2013) Skill learning strengthens cortical representations of  
816 motor sequences. *Elife* 2:1–20.
- 817 Wiestler T, Waters-Metenier S, Diedrichsen J (2014) Effector-Independent Motor  
818 Sequence Representations Exist in Extrinsic and Intrinsic Reference Frames. *J*  
819 *Neurosci* 34:5054–5064.
- 820 Wong AL, Lindquist MA, Haith AM, Krakauer JW (2015) Explicit knowledge enhances  
821 motor vigor and performance: motivation versus practice in sequence tasks. *J*  
822 *Neurophysiol* 114:219–232.
- 823 Wright DL, Rhee J-H, Vaculin A (2010) Offline Improvement during Motor Sequence  
824 Learning Is Not Restricted to Developing Motor Chunks. *J Mot Behav* 42:317–324.
- 825 Wymbs NF, Bassett DS, Mucha PJ, Porter MA, Grafton ST (2012) Differential  
826 Recruitment of the Sensorimotor Putamen and Frontoparietal Cortex during Motor  
827 Chunking in Humans. *Neuron* 74:936–946.
- 828 Yokoi A, Bai W, Diedrichsen J, Yokoi XA, Bai W, Diedrichsen XJ (2017) Restricted  
829 transfer of learning between unimanual and bimanual finger sequences. *J*  
830 *Neurophysiol* 117:1043–1051.
- 831
